# Supplementary material for: Comparative transcriptomics reveals new insights into melatonin-enhanced drought tolerance in naked oat seedlings
Source: PeerJ. 2022 Jun 28;10:e13669. doi: 10.7717/peerj.13669 (PMC9248784; doi:10.7717/peerj.13669)
Supplement: Table S5 [file peerj-10-13669-s010.xlsx]

## Sheet: KEGG_DOWNandUP_ALL_KEGGenrich
	Table S5 The Kyoto Encyclopedia of Genes and Genomes (KEGG) enrichment analysis with the genes included in each category from the DS+MT vs DS
	#Term	Database	ID	Input number	Background number	P-Value	Corrected P-Value	Input	KO	KO_name
	Plant hormone signal transduction	KEGG PATHWAY	ko04075	18	272	9.24761e-10	4.80876e-08	Cluster-18670.38166|Cluster-18670.50240|Cluster-18670.38545|Cluster-18670.32944|Cluster-18670.24664|Cluster-18670.34242|Cluster-18670.10980|Cluster-18670.56105|Cluster-18670.40095|Cluster-18670.57762|Cluster-18670.42950|Cluster-18670.43085|Cluster-18670.45168|Cluster-18670.45169|Cluster-18670.30764|Cluster-18670.13862|Cluster-18670.56630|Cluster-18670.35713	K14496|K14497|K14497|K14497|K14432|K14498|K14484|K14497|K14498|K14497|K14497|K14497|K14497|K14497|K14497|K14497|K14497|K14496|	PYL|PP2C|PP2C|PP2C|ABF|SNRK2|IAA|PP2C|SNRK2|PP2C|PP2C|PP2C|PP2C|PP2C|PP2C|PP2C|PP2C|PYL|
	beta-Alanine metabolism	KEGG PATHWAY	ko00410	4	51	0.00249403	0.0648447	Cluster-18670.30013|Cluster-18670.12661|Cluster-18670.39217|Cluster-18670.40827	K01578|K13366|K01580|K00797|	MLYCD|MPAO, PAO1|E4.1.1.15, gadB, gadA, GAD|speE, SRM|
	Nitrogen metabolism	KEGG PATHWAY	ko00910	4	67	0.00626068	0.108519	Cluster-18670.11860|Cluster-18670.24627|Cluster-18670.41769|Cluster-18670.37627	K01674|K02575|K10534|K10534|	cah|NRT, narK, nrtP, nasA|NR|NR|
	alpha-Linolenic acid metabolism	KEGG PATHWAY	ko00592	4	74	0.00869781	0.113071	Cluster-18670.43560|Cluster-18670.49639|Cluster-18670.37834|Cluster-18670.36880	K00454|K05894|K00454|K00454|	LOX2S|OPR|LOX2S|LOX2S|
	Linoleic acid metabolism	KEGG PATHWAY	ko00591	3	42	0.0112477	0.116977	Cluster-18670.43560|Cluster-18670.37834|Cluster-18670.36880	K00454|K00454|K00454|	LOX2S|LOX2S|LOX2S|
	Arginine and proline metabolism	KEGG PATHWAY	ko00330	3	77	0.0502721	0.403246	Cluster-18670.12661|Cluster-18670.38484|Cluster-18670.40827	K13366|K00318|K00797|	MPAO, PAO1|PRODH|speE, SRM|
	Starch and sucrose metabolism	KEGG PATHWAY	ko00500	7	327	0.0587122	0.403246	Cluster-18670.41786|Cluster-18670.38339|Cluster-18670.51787|Cluster-18670.28931|Cluster-18670.10932|Cluster-18670.33112|Cluster-18670.43353	K01177|K01177|K00695|K01188|K01213|K01188|K01177|	E3.2.1.2|E3.2.1.2|E2.4.1.13|E3.2.1.21|E3.2.1.67|E3.2.1.21|E3.2.1.2|
	Glycerophospholipid metabolism	KEGG PATHWAY	ko00564	4	140	0.0626683	0.403246	Cluster-18670.39437|Cluster-18670.49811|Cluster-18670.29666|Cluster-18670.18889	K05929|K05929|K05929|K06124|	E2.1.1.103, NMT|E2.1.1.103, NMT|E2.1.1.103, NMT|PHOSPHO1|
	Cutin, suberine and wax biosynthesis	KEGG PATHWAY	ko00073	2	41	0.0731862	0.403246	Cluster-18670.12694|Cluster-18670.11041	K17991|K17991|	PXG|PXG|
	Cyanoamino acid metabolism	KEGG PATHWAY	ko00460	4	151	0.0775472	0.403246	Cluster-18670.28931|Cluster-18670.33112|Cluster-18670.44379|Cluster-18670.43765	K01188|K01188|K13029|K13029|	E3.2.1.21|E3.2.1.21|CYP71E1|CYP71E1|
	Glycosphingolipid biosynthesis - globo series	KEGG PATHWAY	ko00603	1	11	0.117698	0.52622	Cluster-18670.22562	K07407|	E3.2.1.22B, galA, rafA|
	Carotenoid biosynthesis	KEGG PATHWAY	ko00906	2	56	0.121435	0.52622	Cluster-18670.13865|Cluster-18670.14567	K09840|K09840|	NCED|NCED|
	Pyrimidine metabolism	KEGG PATHWAY	ko00240	4	186	0.13515	0.538233	Cluster-18670.48486|Cluster-18670.48487|Cluster-18670.52385|Cluster-18670.49439	K01937|K01937|K01937|K14641|	pyrG, CTPS|pyrG, CTPS|pyrG, CTPS|APY1_2|
	Thiamine metabolism	KEGG PATHWAY	ko00730	1	14	0.144909	0.538233	Cluster-18670.29520	K03146|	THI4, THI1|
	Brassinosteroid biosynthesis	KEGG PATHWAY	ko00905	1	17	0.171288	0.584677	Cluster-18670.56795	K09587|	CYP90B1, DWF4|
	Vitamin B6 metabolism	KEGG PATHWAY	ko00750	1	18	0.179901	0.584677	Cluster-18670.31610	K13248|	PHOSPHO2|
	Zeatin biosynthesis	KEGG PATHWAY	ko00908	1	21	0.20521	0.599248	Cluster-18670.37066	K13495|	CISZOG|
	Mismatch repair	KEGG PATHWAY	ko03430	2	88	0.239655	0.599248	Cluster-18670.28670|Cluster-18670.56451	K07466|K07466|	RFA1, RPA1, rpa|RFA1, RPA1, rpa|
	DNA replication	KEGG PATHWAY	ko03030	2	89	0.243499	0.599248	Cluster-18670.28670|Cluster-18670.56451	K07466|K07466|	RFA1, RPA1, rpa|RFA1, RPA1, rpa|
	Tropane, piperidine and pyridine alkaloid biosynthesis	KEGG PATHWAY	ko00960	1	26	0.245682	0.599248	Cluster-18670.16531	K08081|	TR1|
	Butanoate metabolism	KEGG PATHWAY	ko00650	1	26	0.245682	0.599248	Cluster-18670.39217	K01580|	E4.1.1.15, gadB, gadA, GAD|
	Taurine and hypotaurine metabolism	KEGG PATHWAY	ko00430	1	27	0.253528	0.599248	Cluster-18670.39217	K01580|	E4.1.1.15, gadB, gadA, GAD|
	Homologous recombination	KEGG PATHWAY	ko03440	2	97	0.274313	0.620187	Cluster-18670.28670|Cluster-18670.56451	K07466|K07466|	RFA1, RPA1, rpa|RFA1, RPA1, rpa|
	Glycerolipid metabolism	KEGG PATHWAY	ko00561	2	105	0.305084	0.661016	Cluster-18670.37851|Cluster-18670.22562	K09480|K07407|	E2.4.1.241|E3.2.1.22B, galA, rafA|
	Sphingolipid metabolism	KEGG PATHWAY	ko00600	1	39	0.3416	0.672207	Cluster-18670.22562	K07407|	E3.2.1.22B, galA, rafA|
	Galactose metabolism	KEGG PATHWAY	ko00052	2	117	0.350754	0.672207	Cluster-18670.13794|Cluster-18670.22562	K00850|K07407|	pfkA, PFK|E3.2.1.22B, galA, rafA|
	Phenylpropanoid biosynthesis	KEGG PATHWAY	ko00940	4	289	0.361859	0.672207	Cluster-18670.28931|Cluster-18670.42054|Cluster-18670.33112|Cluster-18670.40497	K01188|K00430|K01188|K00430|	E3.2.1.21|E1.11.1.7|E3.2.1.21|E1.11.1.7|
	Propanoate metabolism	KEGG PATHWAY	ko00640	1	42	0.361958	0.672207	Cluster-18670.30013	K01578|	MLYCD|
	Steroid biosynthesis	KEGG PATHWAY	ko00100	1	49	0.407065	0.729909	Cluster-18670.56551	K14423|	SMO1|
	Nucleotide excision repair	KEGG PATHWAY	ko03420	2	137	0.424383	0.735597	Cluster-18670.28670|Cluster-18670.56451	K07466|K07466|	RFA1, RPA1, rpa|RFA1, RPA1, rpa|
	Pentose and glucuronate interconversions	KEGG PATHWAY	ko00040	1	58	0.460443	0.752456	Cluster-18670.10932	K01213|	E3.2.1.67|
	Glutathione metabolism	KEGG PATHWAY	ko00480	2	148	0.46305	0.752456	Cluster-18670.34394|Cluster-18670.40827	K00799|K00797|	GST, gst|speE, SRM|
	Inositol phosphate metabolism	KEGG PATHWAY	ko00562	1	86	0.597881	0.902621	Cluster-18670.49875	K05857|	PLCD|
	Alanine, aspartate and glutamate metabolism	KEGG PATHWAY	ko00250	1	91	0.618479	0.902621	Cluster-18670.39217	K01580|	E4.1.1.15, gadB, gadA, GAD|
	Citrate cycle (TCA cycle)	KEGG PATHWAY	ko00020	1	94	0.630332	0.902621	Cluster-18670.54328	K00161|	PDHA, pdhA|
	Pentose phosphate pathway	KEGG PATHWAY	ko00030	1	96	0.63803	0.902621	Cluster-18670.13794	K00850|	pfkA, PFK|
	Glycolysis / Gluconeogenesis	KEGG PATHWAY	ko00010	2	213	0.657327	0.902621	Cluster-18670.13794|Cluster-18670.54328	K00850|K00161|	pfkA, PFK|PDHA, pdhA|
	Fructose and mannose metabolism	KEGG PATHWAY	ko00051	1	103	0.663744	0.902621	Cluster-18670.13794	K00850|	pfkA, PFK|
	Oxidative phosphorylation	KEGG PATHWAY	ko00190	2	221	0.676966	0.902621	Cluster-18670.45826|Cluster-18670.28657	K01507|K01535|	ppa|PMA1, PMA2|
	Peroxisome	KEGG PATHWAY	ko04146	1	124	0.730513	0.949667	Cluster-18670.30013	K01578|	MLYCD|
	Pyruvate metabolism	KEGG PATHWAY	ko00620	1	134	0.75751	0.950022	Cluster-18670.54328	K00161|	PDHA, pdhA|
	Cysteine and methionine metabolism	KEGG PATHWAY	ko00270	1	149	0.793058	0.950022	Cluster-18670.40827	K00797|	speE, SRM|
	Ribosome biogenesis in eukaryotes	KEGG PATHWAY	ko03008	1	157	0.809853	0.950022	Cluster-18670.22945	K14565|	NOP58|
	Plant-pathogen interaction	KEGG PATHWAY	ko04626	2	319	0.850633	0.950022	Cluster-18670.50787|Cluster-18670.55779	K13447|K13420|	RBOH|FLS2|
	Amino sugar and nucleotide sugar metabolism	KEGG PATHWAY	ko00520	1	181	0.852547	0.950022	Cluster-18670.14207	K01183|	E3.2.1.14|
	RNA degradation	KEGG PATHWAY	ko03018	1	181	0.852547	0.950022	Cluster-18670.13794	K00850|	pfkA, PFK|
	mRNA surveillance pathway	KEGG PATHWAY	ko03015	1	185	0.858674	0.950022	Cluster-18670.56585	K14397|	NUDT21, CPSF5, CFIM25|
	Purine metabolism	KEGG PATHWAY	ko00230	1	209	0.89048	0.964687	Cluster-18670.49439	K14641|	APY1_2|
	Protein processing in endoplasmic reticulum	KEGG PATHWAY	ko04141	2	408	0.930056	0.965553	Cluster-18670.13357|Cluster-18670.43238	K13993|K14009|	HSP20|BCAP31, BAP31|
	Ubiquitin mediated proteolysis	KEGG PATHWAY	ko04120	1	258	0.93504	0.965553	Cluster-18670.29932	K10144|	RCHY1, PIRH2|
	RNA transport	KEGG PATHWAY	ko03013	1	277	0.946985	0.965553	Cluster-18670.49695	K00784|	rnz|
	Ribosome	KEGG PATHWAY	ko03010	1	480	0.994091	0.994091	Cluster-18670.13721	K02884|	RP-L19, MRPL19, rplS|
