# Supplementary material for: Comparative transcriptomics reveals new insights into melatonin-enhanced drought tolerance in naked oat seedlings
Source: PeerJ. 2022 Jun 28;10:e13669. doi: 10.7717/peerj.13669 (PMC9248784; doi:10.7717/peerj.13669)
Supplement: Table S8 [file peerj-10-13669-s013.xlsx]

## Sheet: Figure 1
	Plant height
	Variety	Treatments						ave	stdev
	H2	CK	52	53	52.5	50.5	52	52	0.935414
		DS	44	41	42	44	40	42.2	1.49265
		DS+MT	46	46	47	45	47	46.2	0.829458
	J15	CK	54	58	57	56.5	48	54.7	4.00662
		DS	49	46	46	48	48	47.4	1.01587
		DS+MT	53	49	50	51	50	50.6	0.756307
	Leaf area （cm2）
	Variety	Treatments						ave	stdev
	H2	CK	91.2	97.35	75.15	94.95	94.95	90.72	8.97772
		DS	48.975	41.325	46.125	38.7	41.025	43.23	4.19518
		DS+MT	72.1125	68.1	71.475	79.05	68.4	71.8275	4.41622
	J15	CK	87.3	80.7375	84.1125	80.3625	82.6125	83.025	2.82622
		DS	54.825	58.65	72.6375	60.7875	56.025	60.585	7.12424
		DS+MT	89.475	54.945	71.55	69.75	73.425	71.829	12.2821
	Dry weight (g)
	Variety	Treatments				ave	stdev
	H2	CK	1.343	1.005	1.081	1.143	0.177325
		DS	0.579	0.736	0.615	0.643333	0.0822456
		DS+MT	0.975	1.009	0.977	0.987	0.0190788
	J15	CK	0.909	1.021	0.973	0.967667	0.0561902
		DS	0.664	0.623	0.67	0.652333	0.0255799
		DS+MT	0.828	0.745	0.65	0.741	0.0890674
	Fresh weight (g)
	Variety	Treatments				ave	stdev
	H2	CK	12.071	8.14	8.689	9.63333	2.12885
		DS	3.571	5.012	3.796	4.12633	0.775216
		DS+MT	5.548	7.988	4.735	6.09033	1.69295
	J15	CK	7.146	7.955	8.053	7.718	0.497784
		DS	4.01	4.672	4.009	4.23033	0.382495
		DS+MT	5.522	4.501	4.199	4.74067	0.693298

## Sheet: Figure 2
	SPAD
	Variety	Treatments									ave	stdev
	H2	CK	38.5	36.8	38	37	36.5	40.6	36.5	38	37.7375	1.38351
		DS	31.2	32.7	33.1	35.4	34.6	29.1	29.1	34.6	32.475	2.46214
		DS+MT	34.9	36.5	36.1	36.2	35.1	35.4	36.7	35.4	35.7875	0.672814
	J15	CK	39.6	40.7	40.4	39.7	37	37.7	38.4	40.7	39.275	1.41598
		DS	35.3	37.8	36.1	38.2	36.2	36.1	39.6	36.5	36.975	1.42603
		DS+MT	38.1	38.7	36	37.1	37	40.1	34.6	39.8	37.675	1.8775
	Pn （μmol・m-2·s-1）
	Variety	Treatments				ave	stdev
	H2	CK	7.42175	6.4382	6.9797	6.94655	0.492609
		DS	3.72926	3.25144	3.27271	3.4178	0.269941
		DS+MT	3.97749	4.242	4.26065	4.16005	0.158372
	J15	CK	7.88487	6.05852	5.83303	6.59214	1.1252
		DS	3.83707	4.12436	3.85375	3.93839	0.161271
		DS+MT	4.89009	4.0168	4.53991	4.48227	0.439493
	Leaf relative water content (%)
	Variety	Treatments				ave	stdev
	H2	CK	85.8742	89.8724	87.771	87.8392	1.99998
		DS	69.6661	72.2152	67.5987	69.8267	2.31244
		DS+MT	74.8236	75.7129	74.6903	75.0756	0.555933
	J15	CK	85.6796	87.1653	89.1175	87.3208	1.72424
		DS	70.3214	71.5652	68.0876	69.9914	1.76215
		DS+MT	74.1054	71.5481	75.6201	73.7579	2.05813
	Leaf relative water content (%)
	Variety	Treatments				ave	stdev
	H2	CK	4.13495	3.48505	4.8355	4.15184	0.675386
		DS	7.851	8.19141	6.00785	7.35009	1.17481
		DS+MT	8.68726	8.84008	8.23611	8.58782	0.314029
	J15	CK	5.84635	4.94258	5.25358	5.3475	0.459148
		DS	7.51022	7.29191	5.7579	6.85334	0.954938
		DS+MT	7.16457	5.51173	6.72991	6.46874	0.85681
